# Supplementary material for: Understanding the Variation within a Dietary Guideline Index Score to Identify the Priority Food Group Targets for Improving Diet Quality across Population Subgroups
Source: Int J Environ Res Public Health. 2021 Jan 6;18(2):378. doi: 10.3390/ijerph18020378 (PMC7825319; doi:10.3390/ijerph18020378)
Supplement: Supplementary file 1 [file ijerph-18-00378-s001.pdf]

1  
2

**Table S1.** Number of low scoring components within individuals' dietary guideline index score by gender, age group, weight status and diet quality.

|               |                          | 0    | 1     | 2     | 3     | 4     | 5     | 6     | 7    | 8    | 9    |
|---------------|--------------------------|------|-------|-------|-------|-------|-------|-------|------|------|------|
| Total sample  | Total                    | 0.7% | 5.7%  | 16.8% | 27.0% | 23.9% | 15.2% | 7.2%  | 2.7% | 0.7% | 0.1% |
| Gender        | Male                     | 0.5% | 4.7%  | 14.7% | 25.5% | 24.8% | 17.1% | 8.3%  | 3.3% | 0.9% | 0.1% |
|               | Female                   | 0.9% | 6.7%  | 18.9% | 28.5% | 23.0% | 13.3% | 6.1%  | 2.1% | 0.5% | 0.1% |
| Age group     | 18–30 years              | 0.4% | 3.8%  | 13.4% | 24.4% | 24.6% | 17.8% | 9.9%  | 4.1% | 1.3% | 0.2% |
|               | 31–50 years              | 0.4% | 4.1%  | 13.4% | 24.9% | 25.7% | 18.2% | 9.0%  | 3.3% | 0.9% | 0.1% |
|               | 51–70 years              | 1.0% | 7.2%  | 20.2% | 29.3% | 22.9% | 12.6% | 4.8%  | 1.7% | 0.3% | 0.0% |
|               | 71+ years                | 1.5% | 9.9%  | 24.6% | 32.4% | 19.6% | 8.0%  | 2.8%  | 0.8% | 0.2% | 0.0% |
| Weight status | Underweight              | 0.6% | 4.9%  | 15.3% | 25.3% | 23.4% | 15.8% | 8.0%  | 4.5% | 1.8% | 0.4% |
|               | Normal weight            | 0.8% | 5.9%  | 17.6% | 28.1% | 23.7% | 14.4% | 6.5%  | 2.3% | 0.6% | 0.1% |
|               | Overweight               | 0.7% | 5.8%  | 16.8% | 27.1% | 24.3% | 15.1% | 6.9%  | 2.5% | 0.6% | 0.1% |
|               | Obese                    | 0.6% | 5.2%  | 15.2% | 24.8% | 23.5% | 16.8% | 9.0%  | 3.6% | 1.1% | 0.2% |
| Diet quality  | Below average            | 0.0% | 0.0%  | 1.5%  | 15.4% | 33.7% | 28.2% | 14.2% | 5.3% | 1.4% | 0.2% |
|               | Average or above average | 1.5% | 11.4% | 32.3% | 38.8% | 13.9% | 2.0%  | 0.1%  | 0.0% | 0.0% | 0.0% |

3
